# Supplementary material for: Cistromic and genetic evidence that the vitamin D receptor mediates susceptibility to latitude-dependent autoimmune diseases
Source: PubMed Central journal article supplement — Genes Immun. 2016 Mar 17;17(4):213–9. doi: 10.1038/gene.2016.12 (PMC4895389; doi:10.1038/gene.2016.12), 2016-03-17

ST1a. All peaks motifs

| CD14  |                |           |              | DC1   |                |           | DC2          |       |            |           |              |
|-------|----------------|-----------|--------------|-------|----------------|-----------|--------------|-------|------------|-----------|--------------|
| motif | Name           | p Value   | log P-pvalue | motif | Name           | p Value   | log P-pvalue | motif | Name       | p Value   | log P-pvalue |
|       | VDR            | 1e-559    | -1.29E+03    |       | SFP11          | 1e-1362   | -3.14E+03    |       | VDR        | 1e-555    | -1.28E+03    |
|       | SFP11          | 1.00E-293 | -6.76E+02    |       | CEBP(bZIP)     | 1e-1148   | -2.65E+03    |       | CEBP-AP1   | 1.00E-124 | -2.87E+02    |
|       | CEBP(bZIP)     | 1.00E-206 | -4.75E+02    |       | BATF(bZIP)     | 1e-1061   | -2.44E+03    |       | SFP11      | 1.00E-118 | -2.73E+02    |
|       | BRCA1          | 1.00E-35  | -8.23E+01    |       | VDR            | 1e-999    | -2.30E+03    |       | BATF(bZIP) | 1.00E-117 | -2.70E+02    |
|       | JUN            | 1.00E-31  | -7.16E+01    |       | RELA           | 1e-356    | -8.22E+02    |       | NR2F2      | 1.00E-44  | -1.03E+02    |
|       | SPI1           | 1.00E-28  | -6.53E+01    |       | Ddit3::Cebpa   | 1.00E-229 | -5.28E+02    |       | RELA       | 1.00E-35  | -8.07E+01    |
|       | NKX2-5         | 1.00E-26  | -6.12E+01    |       | IRF2           | 1.00E-207 | -4.79E+02    |       | PAX2       | 1.00E-34  | -7.91E+01    |
|       | CEBP-AP1       | 1.00E-22  | -5.11E+01    |       | JUN            | 1.00E-190 | -4.38E+02    |       | MYBL2      | 1.00E-30  | -7.12E+01    |
|       | CEBP-AP1       | 1.00E-20  | -4.72E+01    |       | RUNX2(Runt)    | 1.00E-170 | -3.92E+02    |       | BRCA1      | 1.00E-26  | -6.11E+01    |
|       | RUNX(Runt)     | 1.00E-19  | -4.50E+01    |       | IRF4           | 1.00E-102 | -2.36E+02    |       | NR4A2      | 1.00E-26  | -6.01E+01    |
|       | MEIS1          | 1.00E-15  | -3.63E+01    |       | CEBPB          | 1.00E-95  | -2.21E+02    |       | STAT1      | 1.00E-23  | -5.49E+01    |
|       | CEBP(bZIP)     | 1.00E-15  | -3.63E+01    |       | USF2           | 1.00E-92  | -2.13E+02    |       | RXRA       | 1.00E-19  | -4.55E+01    |
|       | CEBPB          | 1.00E-15  | -3.48E+01    |       | BRCA1          | 1.00E-87  | -2.03E+02    |       | GF1B       | 1.00E-18  | -4.28E+01    |
|       | SP2            | 1.00E-15  | -3.63E+01    |       | EGR2           | 1.00E-67  | -1.56E+02    |       | NKX2-5     | 1.00E-18  | -4.20E+01    |
|       | IRF3           | 1.00E-19  | -3.07E+01    |       | TFAP4          | 1.00E-51  | -1.18E+02    |       | CEBPA      | 1.00E-18  | -4.28E+01    |
|       | RUNX-AML(Runt) | 1.00E-13  | -3.16E+01    |       | IRF1           | 1.00E-31  | -7.37E+01    |       | DCE_5_II   | 1.00E-14  | -3.30E+01    |
|       | ESRRA          | 1.00E-12  | -2.81E+01    |       | HRE(HSF)       | 1.00E-41  | -9.51E+01    |       | SPI1       | 1.00E-12  | -2.89E+01    |
|       | NKX2-2         | 1.00E-12  | -2.79E+01    |       | SRF            | 1.00E-31  | -7.37E+01    |       | ELF5       | 1.00E-12  | -2.81E+01    |
|       |                |           |              |       | NKX2-3         | 1.00E-31  | -7.27E+01    |       |            |           |              |
|       |                |           |              |       | LXRE(NR/DR4)   | 1.00E-25  | -5.80E+01    |       |            |           |              |
|       |                |           |              |       | X-box(HTH)     | 1.00E-24  | -5.72E+01    |       |            |           |              |
|       |                |           |              |       | RUNX-AML(Runt) | 1.00E-24  | -5.56E+01    |       |            |           |              |
|       |                |           |              |       | BATF::JUN      | 1.00E-24  | -5.53E+01    |       |            |           |              |
|       |                |           |              |       | NKX3-1         | 1.00E-23  | -5.41E+01    |       |            |           |              |
|       |                |           |              |       | IRF9           | 1.00E-19  | -4.52E+01    |       |            |           |              |
|       |                |           |              |       | E2F4           | 1.00E-15  | -3.51E+01    |       |            |           |              |

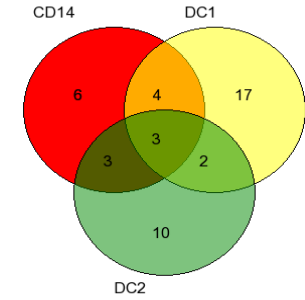

ST1b. canonical VDRE motifs

| CD14  |        |           |              | DC1   |             |           |              | DC2   |        |          |              |
|-------|--------|-----------|--------------|-------|-------------|-----------|--------------|-------|--------|----------|--------------|
| Motif | Name   | p Value   | log P-pvalue | Motif | Name        | p Value   | log P-pvalue | Motif | Name   | p Value  | log P-pvalue |
|       | VDR    | 1e-854    | -1.97E+03    |       | VDR         | 1e-2960   | -6.82E+03    |       | VDR    | 1e-800   | -1.84E+03    |
|       | SP11   | 1.00E-110 | -2.55E+02    |       | SP11        | 1.00E-220 | -5.08E+02    |       | CEBPB  | 1.00E-82 | -1.90E+02    |
|       | CEBPA  | 1.00E-73  | -1.70E+02    |       | CEBP        | 1.00E-160 | -3.70E+02    |       | BATF   | 1.00E-54 | -1.26E+02    |
|       | JUND   | 1.00E-39  | -9.08E+01    |       | BATF        | 1.00E-160 | -3.69E+02    |       | EHF    | 1.00E-51 | -1.18E+02    |
|       | AP-1   | 1.00E-38  | -8.86E+01    |       | PITX1       | 1.00E-73  | -1.69E+02    |       | IRF4   | 1.00E-39 | -9.01E+01    |
|       | SOX10  | 1.00E-21  | -5.04E+01    |       | RELA        | 1.00E-51  | -1.19E+02    |       | PITX1  | 1.00E-27 | -6.35E+01    |
|       | SP1    | 1.00E-19  | -4.44E+01    |       | IRF1        | 1.00E-44  | -1.03E+02    |       | RELA   | 1.00E-21 | -4.96E+01    |
|       | MAFK   | 1.00E-16  | -3.73E+01    |       | THAP1       | 1.00E-35  | -8.18E+01    |       | EHF    | 1.00E-18 | -4.17E+01    |
|       | ARID5A | 1.00E-16  | -3.69E+01    |       | MYB         | 1.00E-29  | -6.88E+01    |       | THAP1  | 1.00E-17 | -3.95E+01    |
|       | CTCF   | 1.00E-15  | -3.46E+01    |       | DDIT3       | 1.00E-29  | -6.79E+01    |       | MZF1   | 1.00E-16 | -3.84E+01    |
|       | SP1    | 1.00E-14  | -3.43E+01    |       | ELF5        | 1.00E-23  | -5.40E+01    |       | INSM1  | 1.00E-16 | -3.84E+01    |
|       | MYB    | 1.00E-14  | -3.31E+01    |       | CEBP-AP1    | 1.00E-23  | -5.30E+01    |       | SP11   | 1.00E-13 | -3.22E+01    |
|       | NFI3   | 1.00E-13  | -3.18E+01    |       | NFYB        | 1.00E-23  | -5.30E+01    |       | HNF1A  | 1.00E-13 | -3.22E+01    |
|       | NR4A2  | 1.00E-12  | -2.91E+01    |       | HNF4A       | 1.00E-22  | -5.28E+01    |       | STAT5  | 1.00E-13 | -3.22E+01    |
|       |        |           |              |       | RHOX6       | 1.00E-22  | -5.19E+01    |       | ESRRB  | 1.00E-13 | -3.22E+01    |
|       |        |           |              |       | CEBP-AP1    | 1.00E-20  | -4.78E+01    |       | JUND   | 1.00E-13 | -3.09E+01    |
|       |        |           |              |       | GF11        | 1.00E-20  | -4.78E+01    |       | GLI3   | 1.00E-12 | -2.94E+01    |
|       |        |           |              |       | GATA3       | 1.00E-19  | -4.48E+01    |       | PITX3  | 1.00E-12 | -2.88E+01    |
|       |        |           |              |       | JUN::FOS    | 1.00E-19  | -4.42E+01    |       | IRF9   | 1.00E-12 | -2.82E+01    |
|       |        |           |              |       | ZNF143 STAF | 1.00E-18  | -4.22E+01    |       | ZNF410 | 1.00E-12 | -2.81E+01    |
|       |        |           |              |       | MYC         | 1.00E-17  | -4.14E+01    |       |        |          |              |
|       |        |           |              |       | PITX1       | 1.00E-17  | -3.99E+01    |       |        |          |              |
|       |        |           |              |       | PLAG1       | 1.00E-16  | -3.76E+01    |       |        |          |              |
|       |        |           |              |       | NR1D1       | 1.00E-15  | -3.58E+01    |       |        |          |              |
|       |        |           |              |       | EGR2        | 1.00E-12  | -2.90E+01    |       |        |          |              |

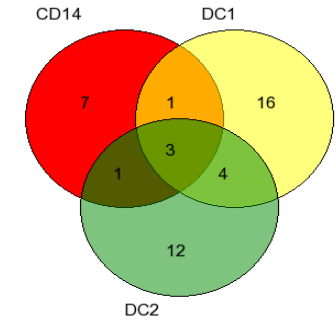

ST1c. non canonical VDRE motifs

| CD14            |  | CD14   | CD14      | CD14         | DC1              |  | DC1          | DC1       | DC2          |                  | DC2 | DC2        | DC2       |              |
|-----------------|--|--------|-----------|--------------|------------------|--|--------------|-----------|--------------|------------------|-----|------------|-----------|--------------|
| Motif           |  | Name   | p Value   | log P-pvalue | Motif            |  | Name         | p Value   | log P-pvalue | Motif            |     | Name       | p Value   | log P-pvalue |
| ATGATGCAATAT    |  | CEBPB  | 1.00E-197 | -4.54E+02    | AASAGGAAGT       |  | SP1          | 1e-1145   | -2.64E+03    | ATTATGCAATAT     |     | CEBPB      | 1.00E-122 | -2.82E+02    |
| AASAGGAAGT      |  | SP1    | 1.00E-178 | -4.11E+02    | ATAATGCAATAT     |  | CEBPA        | 1e-1038   | -2.39E+03    | AGCGTTCAAT       |     | RXRA       | 1.00E-80  | -1.85E+02    |
| ATGACTCA        |  | AP-1   | 1.00E-91  | -2.12E+02    | ATAATGCAATAT     |  | BATF         | 1e-894    | -2.06E+03    | AACAGGAAGT       |     | SP1        | 1.00E-78  | -1.80E+02    |
| GCGCTCTAG       |  | NKX2-5 | 1.00E-24  | -5.68E+01    | TGTGCAAT         |  | CEBPA        | 1e-360    | -8.31E+02    | ATGACTCAAT       |     | AP-1       | 1.00E-73  | -1.69E+02    |
| AACCACATGACT    |  | RUNX1  | 1.00E-22  | -5.27E+01    | GGCAATTCCT       |  | RELA         | 1.00E-293 | -6.75E+02    | GGTCAAGGCG       |     | USF1       | 1.00E-19  | -4.52E+01    |
| AACCCG          |  | GEM1   | 1.00E-20  | -4.71E+01    | ACCAATGAC        |  | NFE2L1::MatG | 1.00E-219 | -5.06E+02    | TTTCCCACTCATCTC  |     | SOX13      | 1.00E-18  | -4.37E+01    |
| AACCATAGAGAC    |  | RUNX1  | 1.00E-19  | -4.50E+01    | ATGAACCTT        |  | RXRA         | 1.00E-199 | -4.60E+02    | AAACCICCAAGACTTC |     | ZNF281     | 1.00E-18  | -4.36E+01    |
| GGGTTAACCCTG    |  | PTX1   | 1.00E-16  | -3.84E+01    | TAACCACAAG       |  | RUNX family  | 1.00E-176 | -4.07E+02    | GGAATTCCTCA      |     | REL        | 1.00E-18  | -4.30E+01    |
| GTGAACAAACCACA  |  | RUNX1  | 1.00E-15  | -3.63E+01    | TTTTCAGGAA       |  | STAT1        | 1.00E-96  | -2.21E+02    | TTTCCGGAA        |     | STAT4      | 1.00E-17  | -4.06E+01    |
| CGTAAC          |  | ELK1   | 1.00E-15  | -3.56E+01    | GTGTTGGGG        |  | EGR2         | 1.00E-72  | -1.68E+02    | AACCGTTGAAC      |     | TCF7L2     | 1.00E-17  | -4.04E+01    |
| AGCCCAAGCACTT   |  | NKX2-1 | 1.00E-14  | -3.45E+01    | CCCATTAAGCAATAAC |  | LHX9         | 1.00E-45  | -1.04E+02    | GTTACG           |     | HLF        | 1.00E-16  | -3.83E+01    |
| TGTGACACATTGAC  |  | JUND   | 1.00E-14  | -3.45E+01    | TTCCCCAAGTGC     |  | TCFAP2B      | 1.00E-42  | -9.72E+01    | AAASCACAATGACCTC |     | VDR        | 1.00E-14  | -3.27E+01    |
| TAGTGCATTGAGTAC |  | NRS2   | 1.00E-14  | -3.45E+01    | CGFAAGCG         |  | GABPA        | 1.00E-36  | -8.49E+01    | CATCGGCT         |     | TAL1::TCF3 | 1.00E-14  | -3.23E+01    |
| CAAAAAGGAGGGTGT |  | FOXO1  | 1.00E-12  | -2.88E+01    | CAGCTG           |  | TFAP4        | 1.00E-36  | -8.32E+01    | TAGTCTCACCCTGC   |     | KLF1       | 1.00E-13  | -3.13E+01    |
|                 |  |        |           |              | GAAACTCGGT       |  | IRF4         | 1.00E-33  | -7.76E+01    | TTCCAAGTACTCCA   |     | RBPJ1      | 1.00E-13  | -3.15E+01    |
|                 |  |        |           |              | ATCACATG         |  | MAX          | 1.00E-33  | -7.63E+01    | CTTCCTAATGATGAAA |     | DDIT3      | 1.00E-13  | -3.13E+01    |
|                 |  |        |           |              | SAAATAAGCAATTCAT |  | DUX4         | 1.00E-33  | -7.62E+01    |                  |     |            |           |              |
|                 |  |        |           |              | TCITAAGAAA       |  | STAT6        | 1.00E-30  | -7.13E+01    |                  |     |            |           |              |
|                 |  |        |           |              | AATGTACTTAATCCA  |  | NKX2-3       | 1.00E-30  | -7.01E+01    |                  |     |            |           |              |
|                 |  |        |           |              | CTAGAGGGCC       |  | NKX2-5       | 1.00E-28  | -6.88E+01    |                  |     |            |           |              |
|                 |  |        |           |              | ATCAIACAGTATTTGT |  | ARID5A       | 1.00E-24  | -5.57E+01    |                  |     |            |           |              |
|                 |  |        |           |              | CATCATGTGICACT   |  | JUND         | 1.00E-23  | -5.35E+01    |                  |     |            |           |              |
|                 |  |        |           |              | ACCATAGAGA       |  | RUNX-AML     | 1.00E-22  | -5.13E+01    |                  |     |            |           |              |
|                 |  |        |           |              | GIACCTCATATAAGTG |  | NKX2-5       | 1.00E-21  | -5.02E+01    |                  |     |            |           |              |
|                 |  |        |           |              | TATACAGTTCAGTAGT |  | RXRA         | 1.00E-20  | -4.75E+01    |                  |     |            |           |              |
|                 |  |        |           |              | TTTTCAAGATGAAAA  |  | MAFB         | 1.00E-17  | -4.00E+01    |                  |     |            |           |              |
|                 |  |        |           |              | TTGCAAGCACTGCACT |  | ZBTB3        | 1.00E-16  | -3.71E+01    |                  |     |            |           |              |
|                 |  |        |           |              | GCAAACTCCAGTCTT  |  | HNFA         | 1.00E-13  | -3.08E+01    |                  |     |            |           |              |

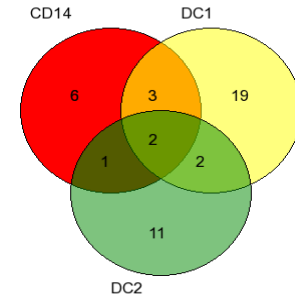

Supplement: gene201612x1.pdf [file gene201612x1.pdf]
